# Supplementary material
Source: PubMed Central journal article supplement (PMC4649643)
Supplement: supp_115.179093_FigureS1.pdf [file supp_115.179093_FigureS1.pdf]

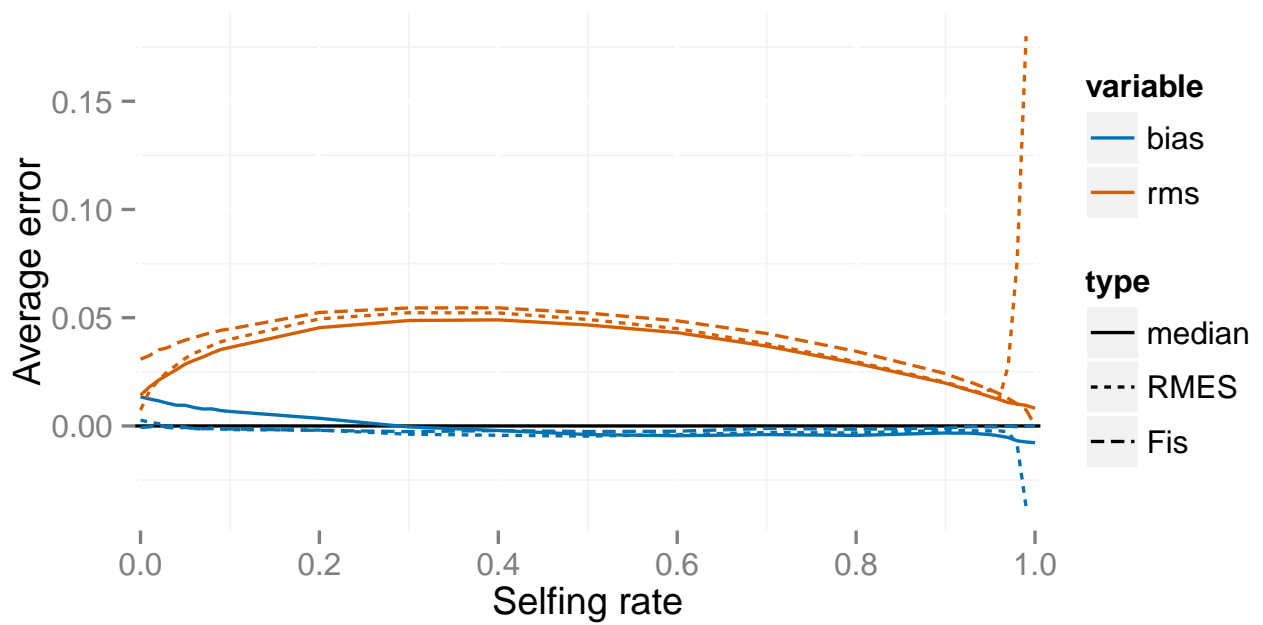

**Figure S1** Errors for the full likelihood (posterior median), RMES, and  $F_{IS}$ -based (27) methods for a large simulated sample ( $n = 70$  individuals,  $L = 32$  loci). In the legend, rms indicates the root-mean-squared error and bias the average deviation. Averages are taken across simulated data sets at each true value of  $s^*$ .
