# Supplementary material
Source: PubMed Central journal article supplement (PMC4649643)
Supplement: supp_115.179093_FigureS2.pdf [file supp_115.179093_FigureS2.pdf]

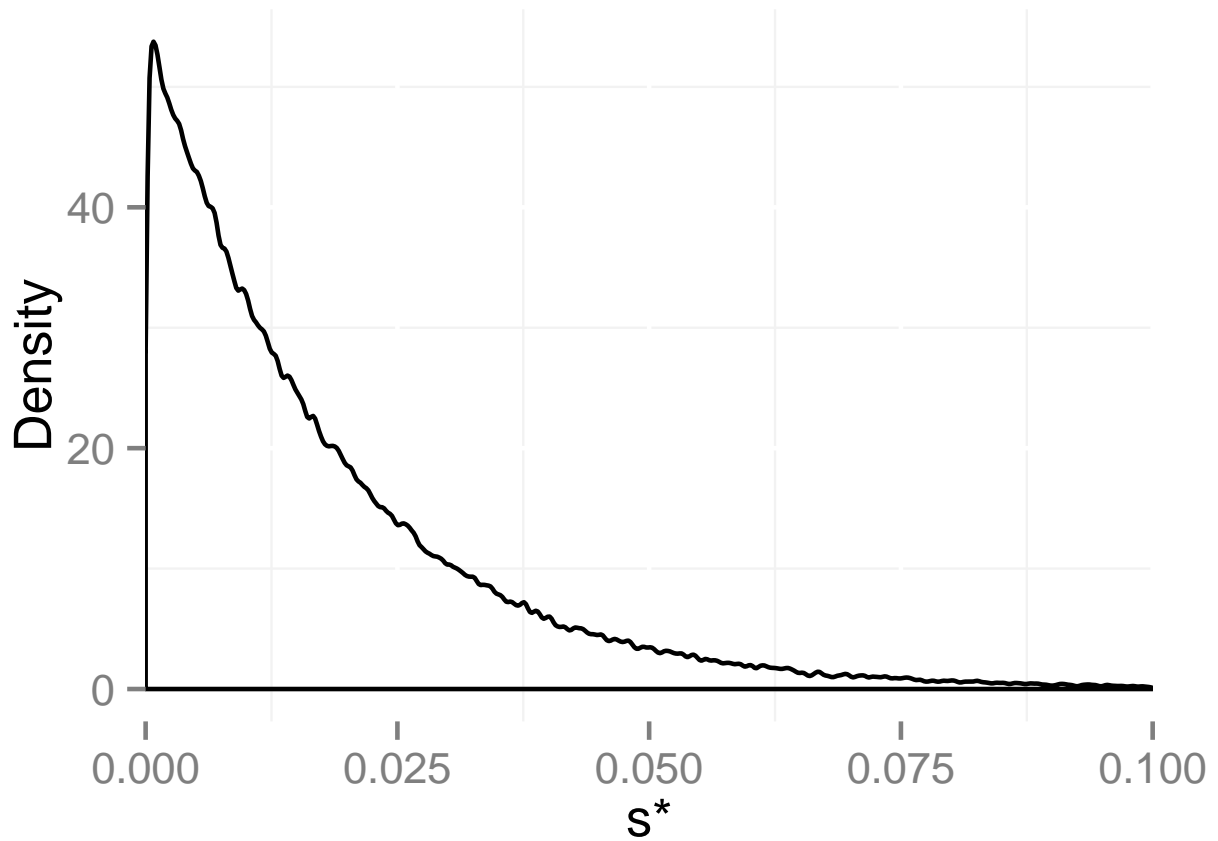

**Figure S2** Average posterior density of the uniparental proportion ( $s^*$ ) inferred from simulated data generated under the large sample regime ( $n = 70$ ,  $L = 32$ ) with a true value of  $s^* = 0$ . The average was taken across posterior densities for 100 data sets.
