# Supplementary material
Source: PubMed Central journal article supplement (PMC4649643)
Supplement: supp_115.179093_FigureS4.pdf [file supp_115.179093_FigureS4.pdf]

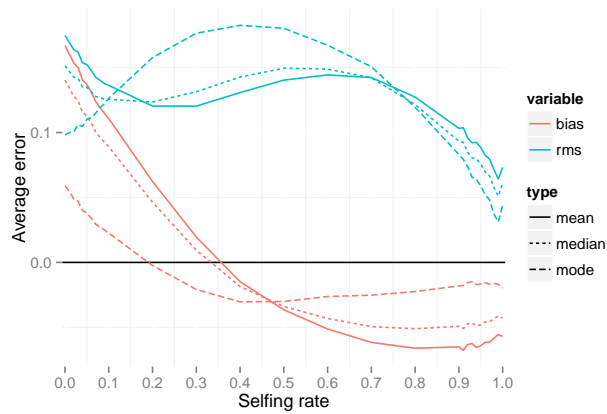

(a)  $n = 10, L = 6$

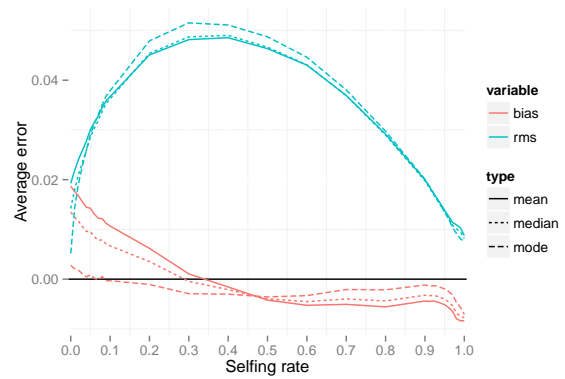

(b)  $n = 70, L = 32$

**Figure S4** Errors for the posterior mean, posterior median, and posterior mode. Blue curves (rms) indicate the root-mean-squared error, and red curves (bias) the average deviation. Averages are taken across simulated data sets at each true value of the selfing rate  $s^*$ .
