# Supplementary material
Source: PubMed Central journal article supplement (PMC4649643)
Supplement: supp_115.179093_FigureS5.pdf [file supp_115.179093_FigureS5.pdf]

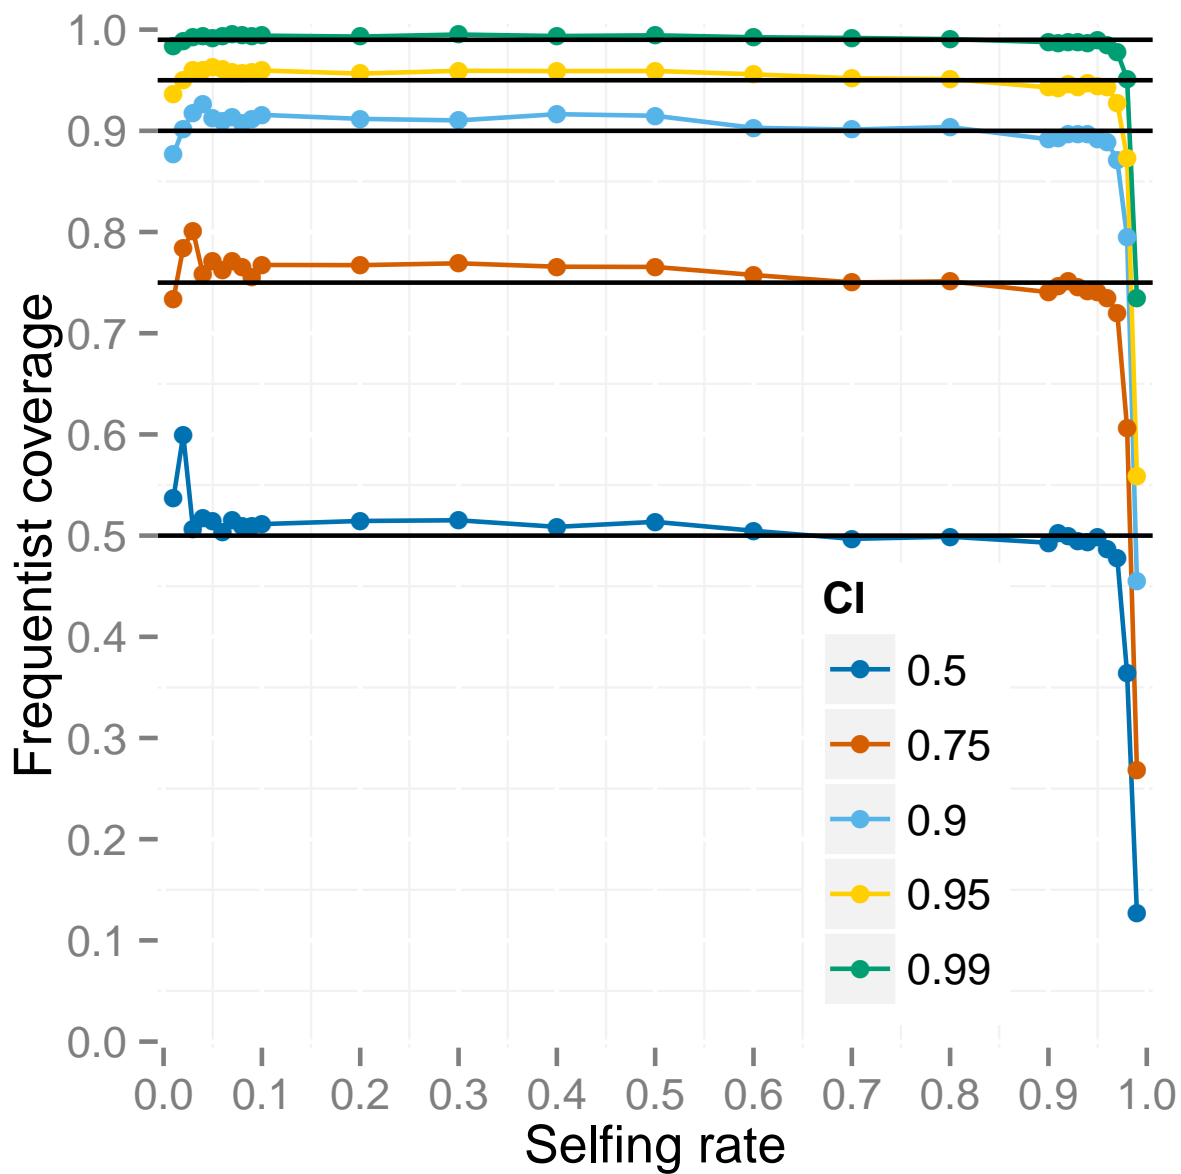

**Figure S5** Frequentist coverage for Bayesian credible intervals at different levels of credibility under the large sampling regime ( $n = 70, L = 32$ ).
