# Supplementary material
Source: PubMed Central journal article supplement (PMC4649643)
Supplement: supp_115.179093_FigureS6.pdf [file supp_115.179093_FigureS6.pdf]

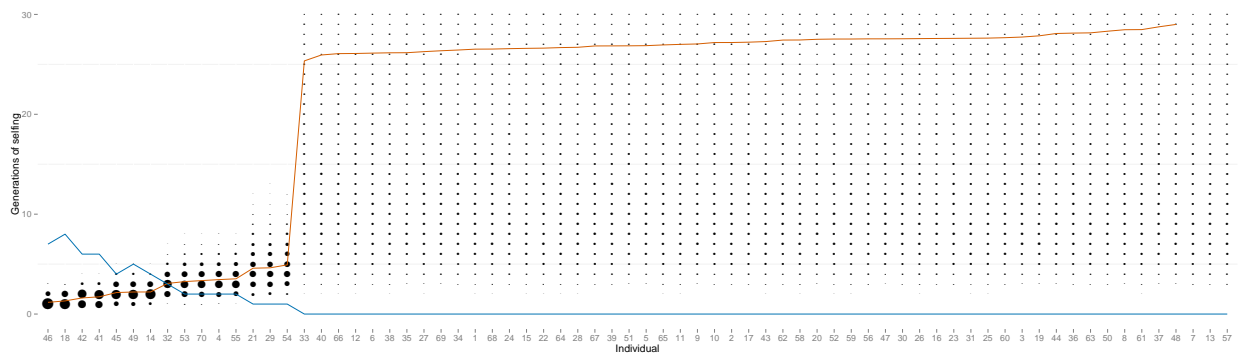

**Figure S6** Number of generations since the most recent outcross event in the ancestry of each individual in the sample from the BP population of *K. marmoratus*. The area of each dot indicates the posterior probability that an individual (X-axis) has the indicated number (Y-axis) of consecutive generations of selfing in its immediate ancestry. The red line indicates the posterior mean number of selfing generations and the blue line indicates the number of heterozygous loci across individuals. The Y-axis is truncated to  $[0, 30]$ .
