# Supplementary material
Source: PubMed Central journal article supplement (PMC4649643)
Supplement: supp_115.179093_FigureS7.pdf [file supp_115.179093_FigureS7.pdf]

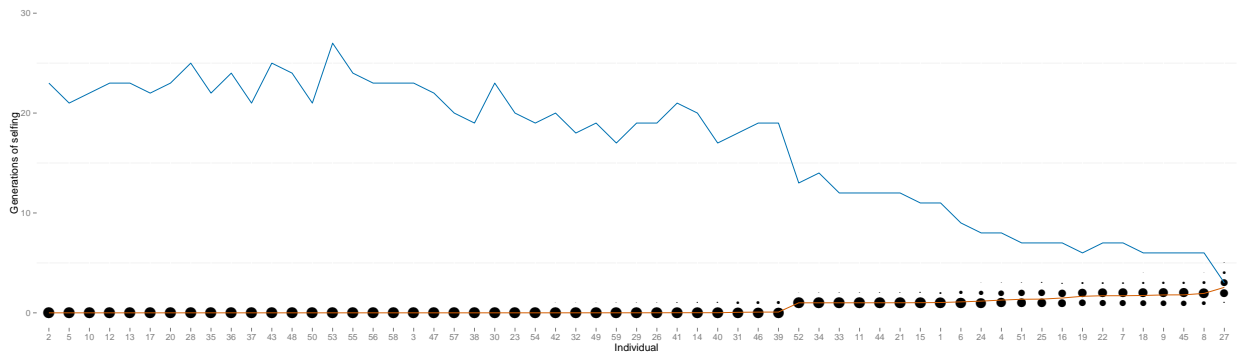

**Figure S7** Number of generations since the most recent outcross event in the ancestry of each individual in the sample from the TC population of *K. marmoratus*. Symbols as in Figure S6.
