# Supplementary material
Source: PubMed Central journal article supplement (PMC4649643)
Supplement: supp_115.179093_FigureS8.pdf [file supp_115.179093_FigureS8.pdf]

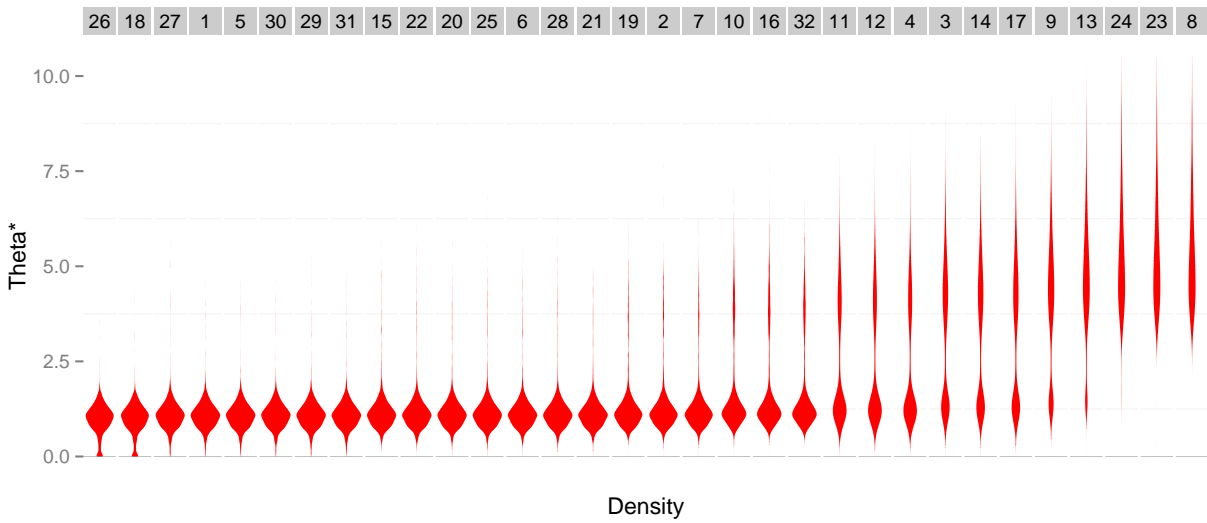

**Figure S8** Posterior distributions for mutation rates at each locus in *K. marmoratus* (BP population). For each distribution, the locus name is indicated in the grey shaded box.
