# Supplementary material
Source: PubMed Central journal article supplement (PMC4649643)
Supplement: supp_115.179093_FigureS9.pdf [file supp_115.179093_FigureS9.pdf]

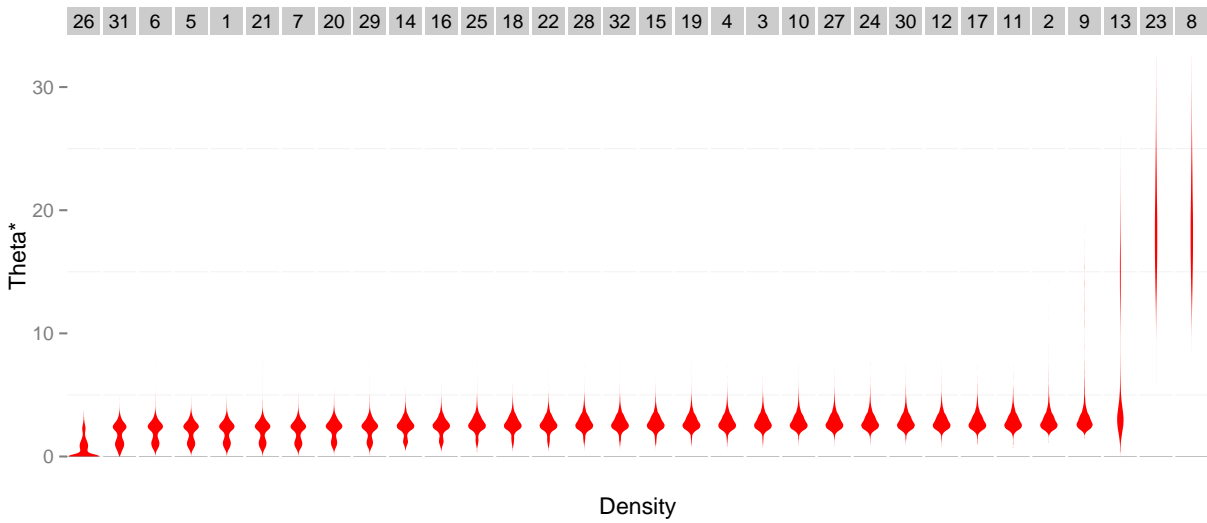

**Figure S9** Mutation rates at each locus for *K. marmoratus* (TC population). For each distribution, the locus name is indicated in the grey shaded box.
