# Supplementary material
Source: PubMed Central journal article supplement (PMC4649643)
Supplement: supp_115.179093_FigureS10.pdf [file supp_115.179093_FigureS10.pdf]

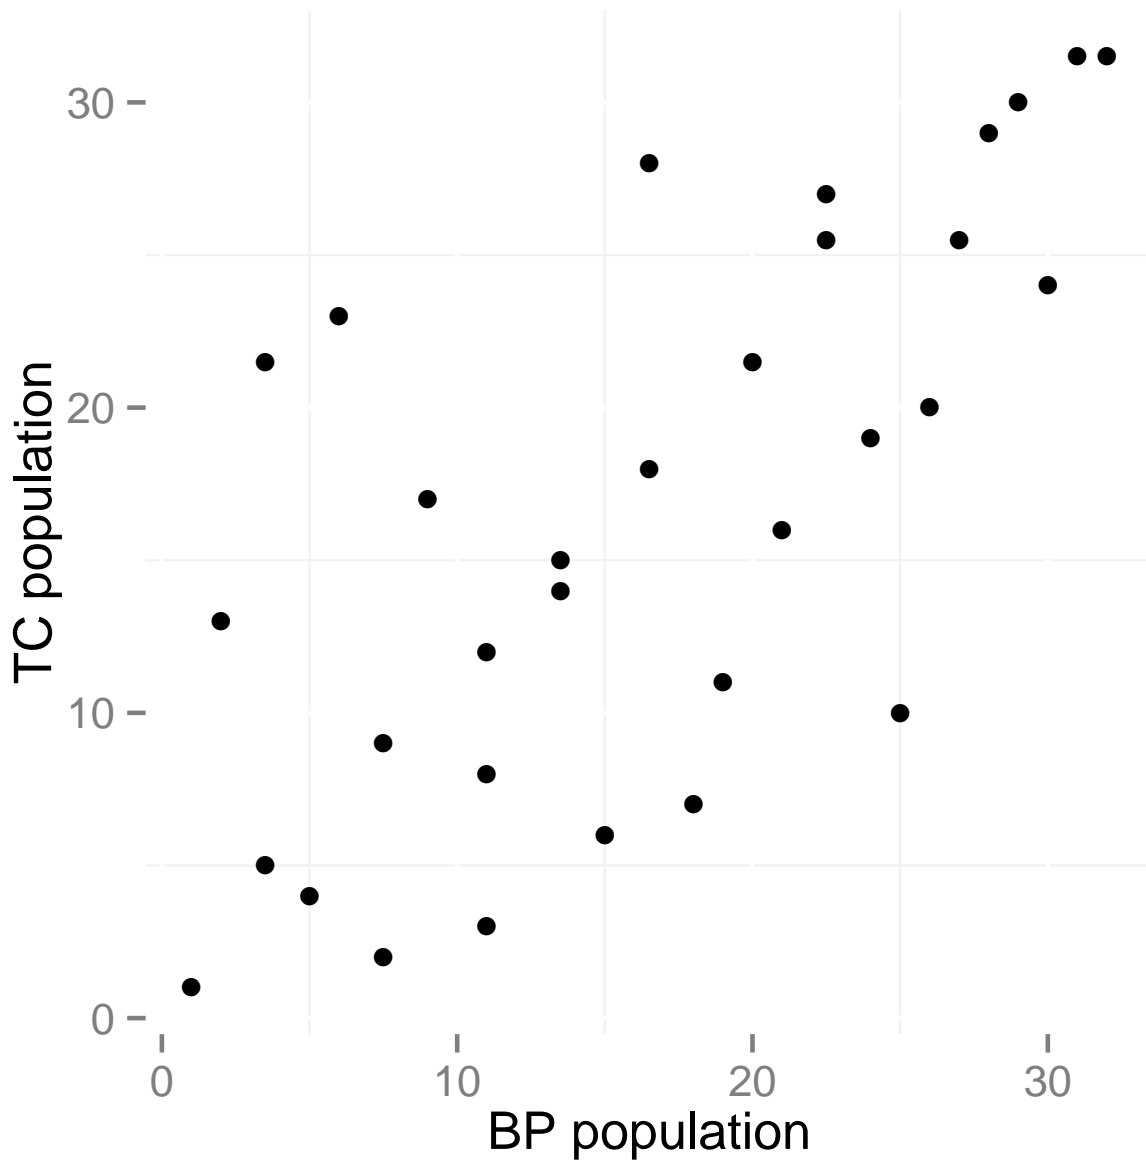

**Figure S10** Comparison of rank order of estimated locus-specific mutation rates between the BP and TC populations of *K. marmoratus*. Each dot represents the rank order of the median of the mutation rate of a given locus estimated from the BP data set versus that from the TC data set.
