# Supplementary material
Source: PubMed Central journal article supplement (PMC4649643)
Supplement: supp_115.179093_FigureS11.pdf [file supp_115.179093_FigureS11.pdf]

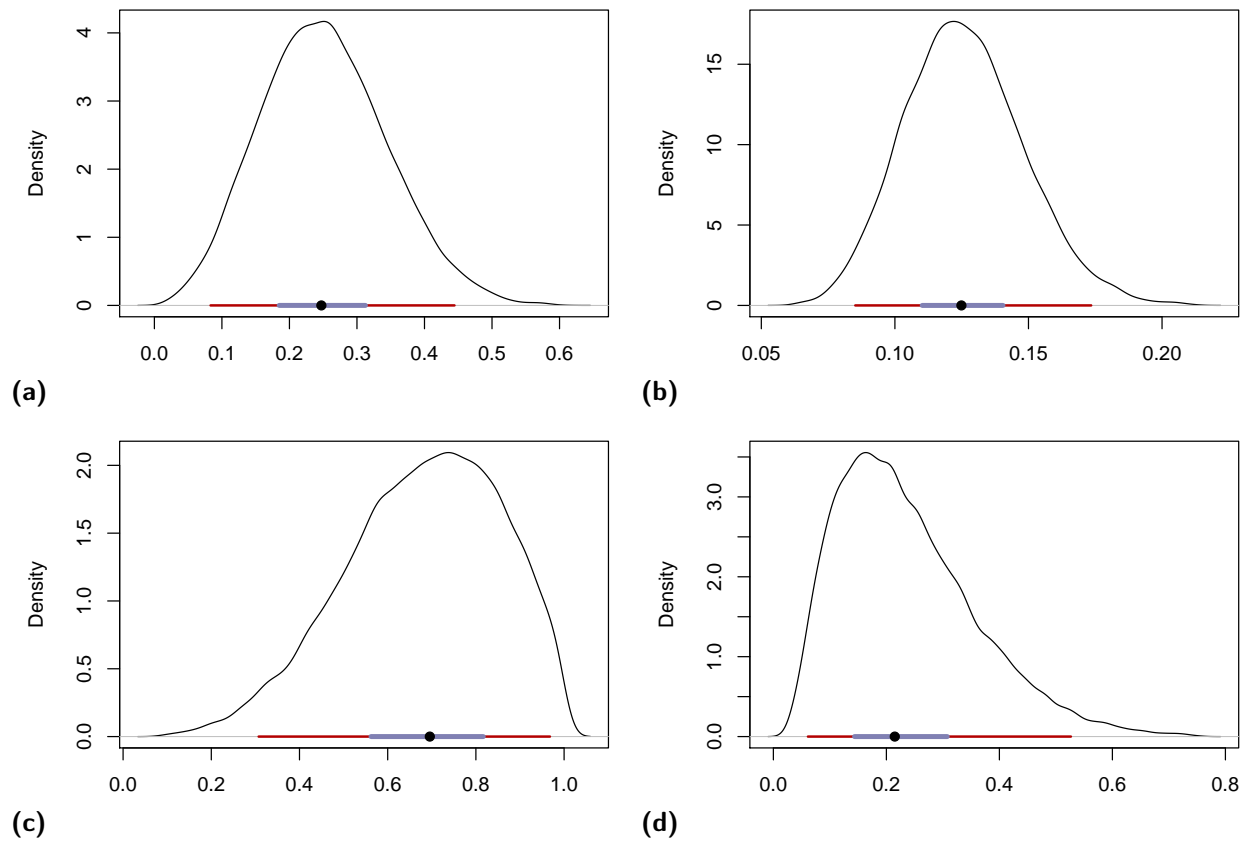

**Figure S11** Posterior distributions on (a)  $s_G$ , (b)  $p_f$ , (c)  $\tilde{s}$ , and (d)  $\tau$  for the *Schiedea salicaria* data set. Also shown are 95% BCI (maroon), 50% BCI (slate), and median (black dot).
