# Supplementary material
Source: PubMed Central journal article supplement (PMC4649643)
Supplement: supp_115.179093_FigureS12.pdf [file supp_115.179093_FigureS12.pdf]

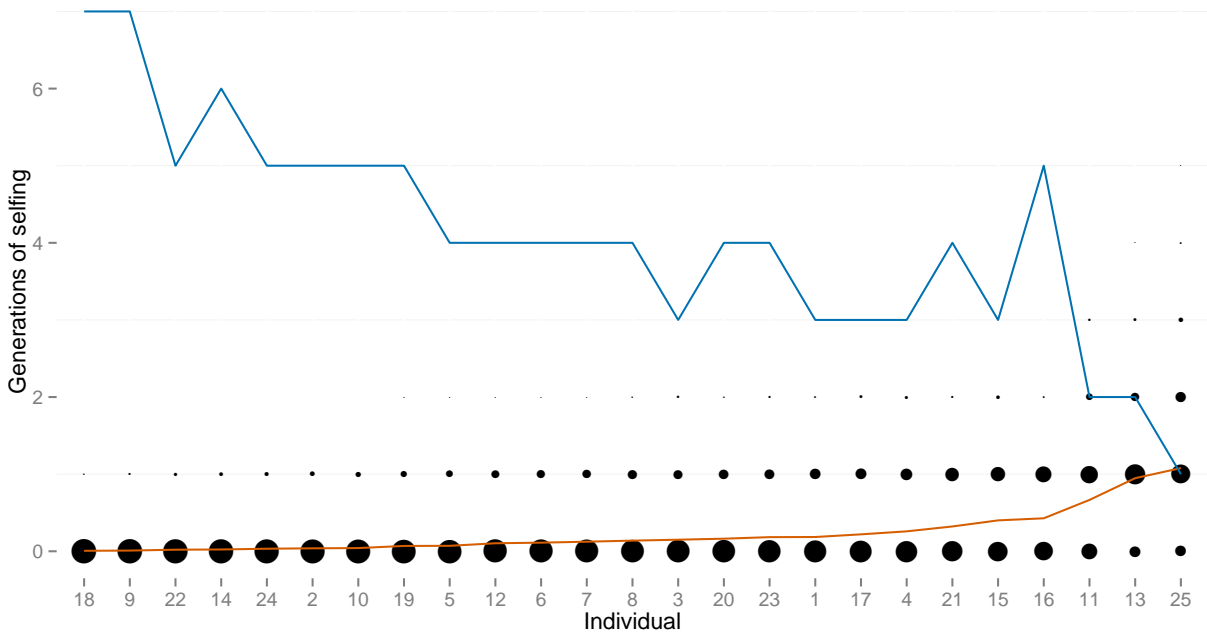

**Figure S12** Estimated number of selfing generations for each individual for *S. salicaria*. The area of each dot indicates the posterior probability that a numbered individual (x-axis) has been selfed for a given number of generations (y-axis). For each individual the red line indicates the posterior mean number of selfing generations and the blue line indicates the number of heterozygous loci.
