# Supplementary material
Source: PubMed Central journal article supplement (PMC4649643)
Supplement: supp_115.179093_FigureS13.pdf [file supp_115.179093_FigureS13.pdf]

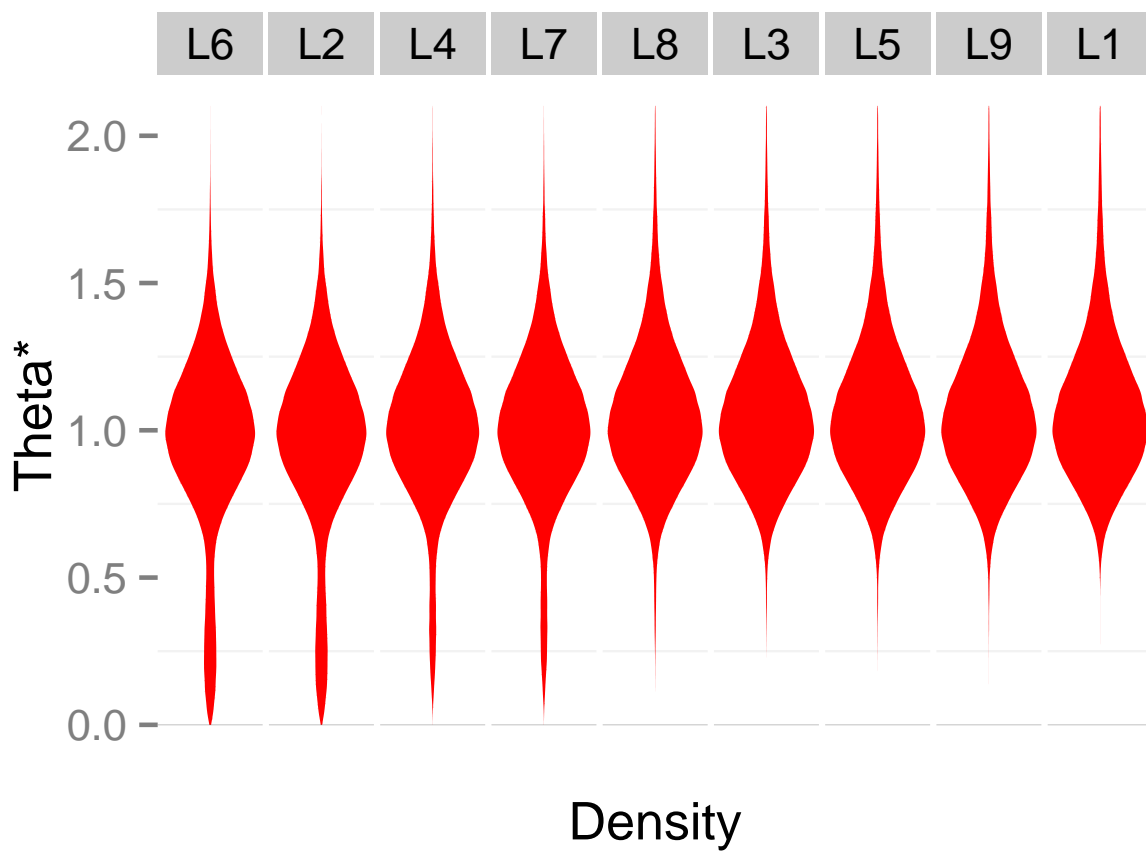

**Figure S13** Posterior distributions for mutation rates at locus in *S. salicaria*. For each distribution, the locus name is indicated in the grey shaded box.
